# Supplementary material for: Intragenomic Variability of ITS Sequences in Bjerkandera adusta
Source: MDPI journal article supplement (doi:10.3390/jof8070654), 2022-06-22
Supplement: s1 [file s1]

**Table S1:** Origin of specimens and variability of *Bjerkandera adusta* ITS sequences obtained through this study.

| Specimen | Origin and host     |                       |                     |                               | GenBank Accession numbers |          | Sequence polymorphism at position |      |         |     | Resulting ITS type |
|----------|---------------------|-----------------------|---------------------|-------------------------------|---------------------------|----------|-----------------------------------|------|---------|-----|--------------------|
|          | Locality            | Coordinates           | Altitude m (a.s.l.) | Host                          | ITS                       | tef1-α   | ITS1                              | ITS2 |         |     |                    |
|          |                     |                       |                     |                               |                           |          | 157                               | 388  | 467-468 | 522 |                    |
| 913      | Sala                | N48.15056° E17.86953° | 123                 | unknown                       | ON391760                  | XX       | C                                 | T    | AG      | G   | A                  |
| 692      | Bratislava          | N48.14658° E17.07328° | 152                 | <i>Corylus avellana</i>       | ON391761                  | ON411223 | C                                 | T    | AG      | G   | A                  |
| B1       | Muranska planina    | N48.76664° E20.07542° | 690                 | unknown                       | ON391762                  | XX       | C                                 | T    | AG      | G   | A                  |
| 738      | Bratislava          | N48.15902° E17.08899° | 213                 | <i>Quercus</i> sp.            | ON391763                  | XX       | C                                 | T    | AG      | G   | A                  |
| 766      | Namestovo           | N49.40535° E19.4795°  | 611                 | <i>Aesculus hippocastanum</i> | ON391764                  | ON411224 | C                                 | T    | AG      | G   | A                  |
| 1749     | Presov              | N49.00797° E21.23379° | 224                 | <i>Salix babylonica</i>       | ON391765                  | ON411228 | C                                 | T    | AG      | G   | A                  |
| 520      | Brezno              | N48.8076° E19.632°    | 500                 | <i>Betula pendula</i>         | ON391766                  | XX       | C                                 | T    | AG      | G   | A                  |
| 676      | Bratislava          | N48.16291° E17.05386° | 188                 | <i>Betula pendula</i>         | ON391767                  | ON411229 | T                                 | C    | GA      | A   | B                  |
| B2       | Streda nad Bodrogom | N48.37054° E21.7512°  | 98                  | unknown                       | ON391768                  | XX       | T                                 | C    | GA      | A   | B                  |
| 1490     | Senica              | N48.67583° E17.36847° | 209                 | <i>Acer negundo</i>           | ON391769                  | ON411227 | T                                 | C    | GA      | A   | B                  |
| 859      | Galanta             | N48.19206° E17.73846° | 119                 | unknown                       | ON391770                  | XX       | Y                                 | Y    | RR      | R   | A x B              |
| 957      | Piestany            | N48.58861° E17.84443° | 168                 | <i>Acer negundo</i>           | ON391771                  | ON411226 | Y                                 | Y    | RR      | R   | A x B              |
| 931      | Surany              | N48.0907° E18.18433°  | 124                 | unknown                       | ON391772                  | XX       | Y                                 | Y    | RR      | R   | A x B              |
| 884      | Sala                | N48.14824° E17.86687° | 116                 | <i>Aesculus hippocastanum</i> | ON391773                  | ON411225 | Y                                 | Y    | RR      | R   | A x B              |
| 898      | Sala                | N48.14812° E17.86811° | 117                 | unknown                       | ON391774                  | XX       | Y                                 | Y    | RR      | R   | A x B              |
| 935      | Surany              | N48.08941° E18.18442° | 125                 | unknown                       | ON391775                  | XX       | Y                                 | Y    | RR      | R   | A x B              |

|     |           |                       |     |         |          |    |   |   |    |   |       |
|-----|-----------|-----------------------|-----|---------|----------|----|---|---|----|---|-------|
| 994 | Zarnovica | N48.48095° E18.71931° | 228 | unknown | ON391776 | XX | Y | Y | RR | R | A x B |
| 902 | Sala      | N48.14852° E17.86614° | 117 | unknown | ON391777 | XX | Y | Y | RR | R | A x B |

Locality, GPS coordinates, altitude and host species (if available) are shown together with GenBank accession numbers for ITS and tef1- $\alpha$  sequences obtained through this study. Sequence at specific position of ITS sequences is shown together with final typization of isolates based on sequence polymorphisms.
